# Supplementary material for: Structure and stability of two dimensional phosphorene with O or NH functionalization
Source: Royal Society of Chemistry journal article supplement (doi:10.1039/c4ra02850c), 2014-01-01
Supplement: c4ra02850c1.pdf [file c4ra02850c1.pdf]

## Electronic Supplementary Information

### Structure and Stability of Two Dimensional Phosphorene with =O or =NH Functionalization

Jun Dai<sup>1</sup> and Xiao Cheng Zeng<sup>1\*</sup>

<sup>1</sup>Department of Chemistry and Department of Mechanical and Materials Engineering,  
University of Nebraska-Lincoln, Lincoln, NE 68588, USA

Email: xzeng1@unl.edu

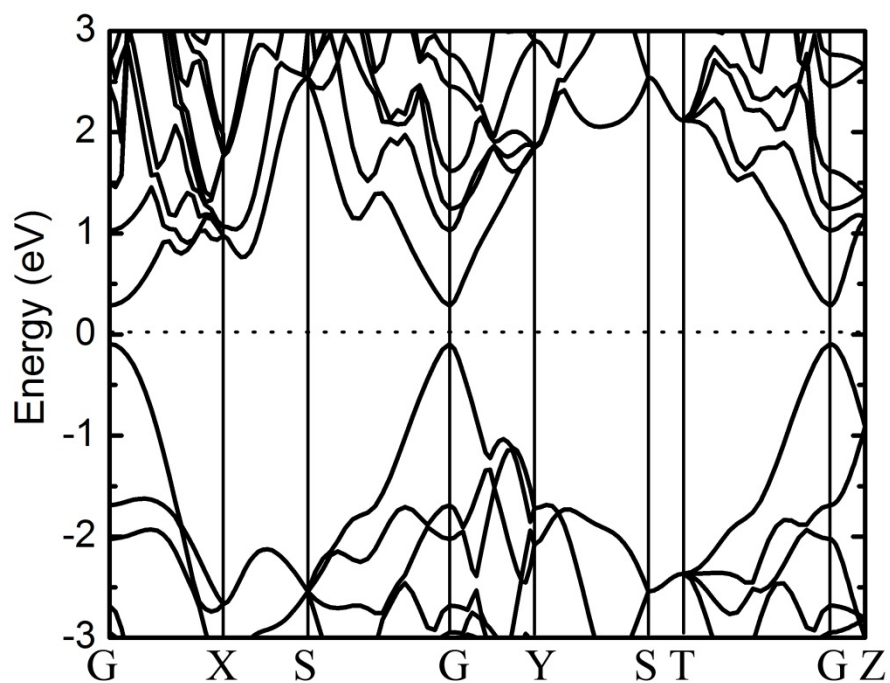

**Figure S1.** Computed band structures (HSE06) of bulk black phosphorus. G (0.0, 0.0, 0.0), X (0.0, 0.5, 0.0), S (0.5, 0.5, 0.00), Y (0.5, 0.0, 0.0), T (0.5, 0.5, 0.5) and Z (0.0, 0.0, 0.5) refer to special points in the first Brillouin zone.

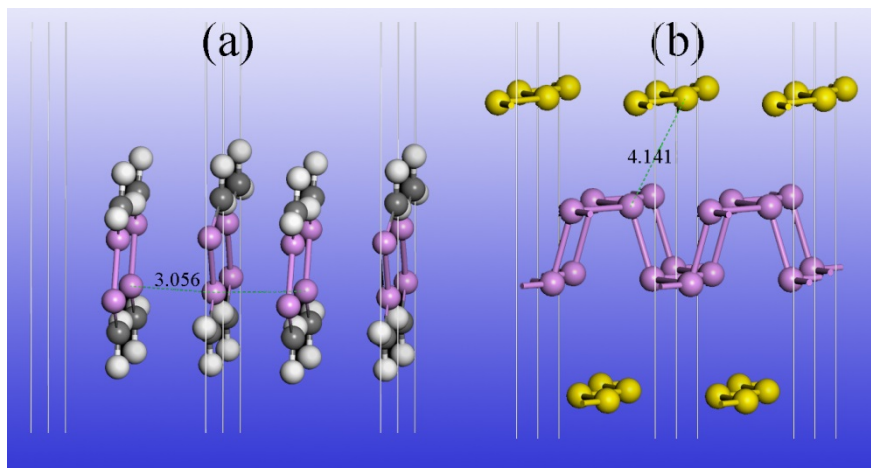

**Figure S2.** Optimized structures of  $=\text{CH}_2$  and  $=\text{S}$  functionalized phosphorene, the pink, grey, white and yellow spheres denote the P, C, H and S atoms, respectively.

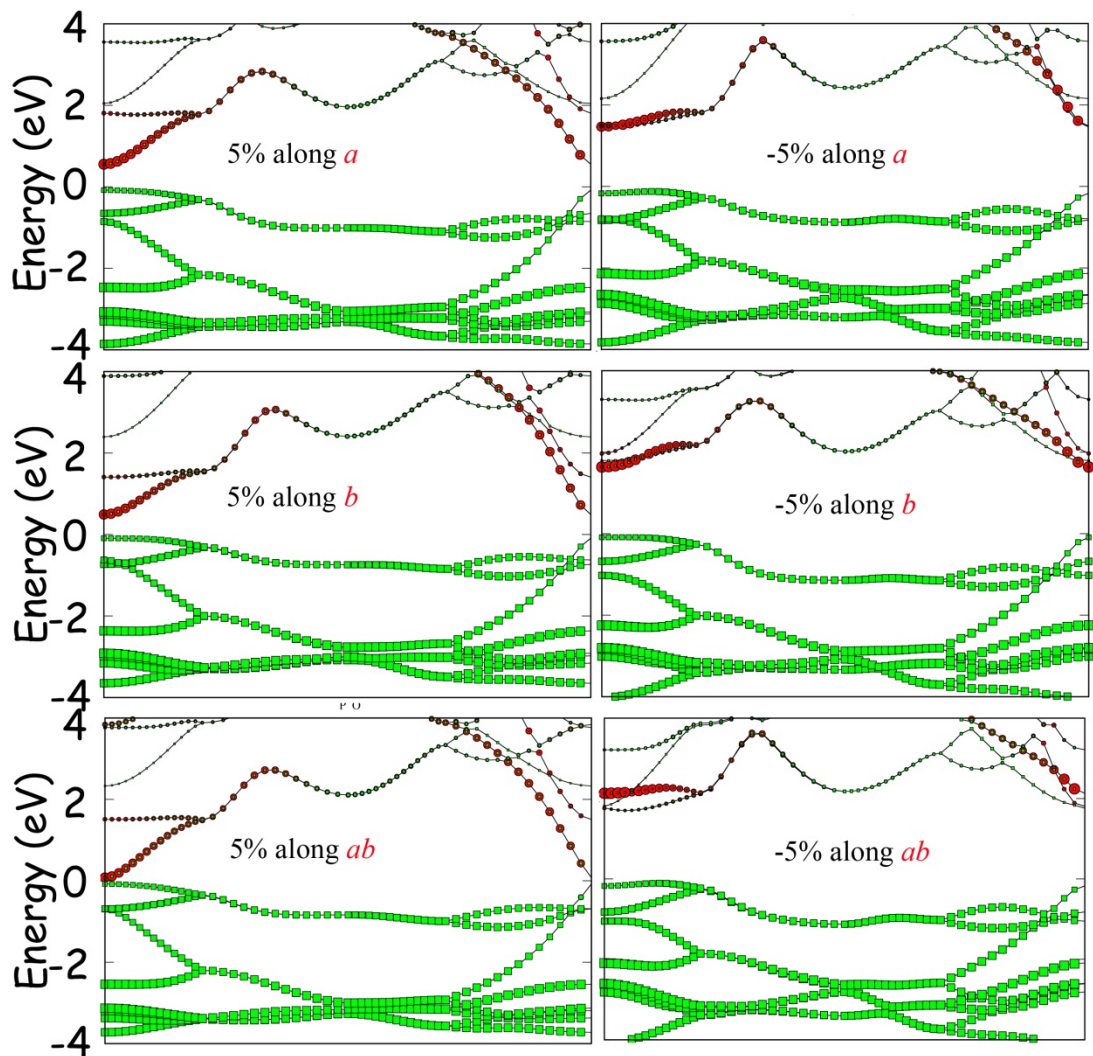

**Figure S3** HSE06 band structures of P-O under uniaxial or biaxial strain of 5% or -5%.

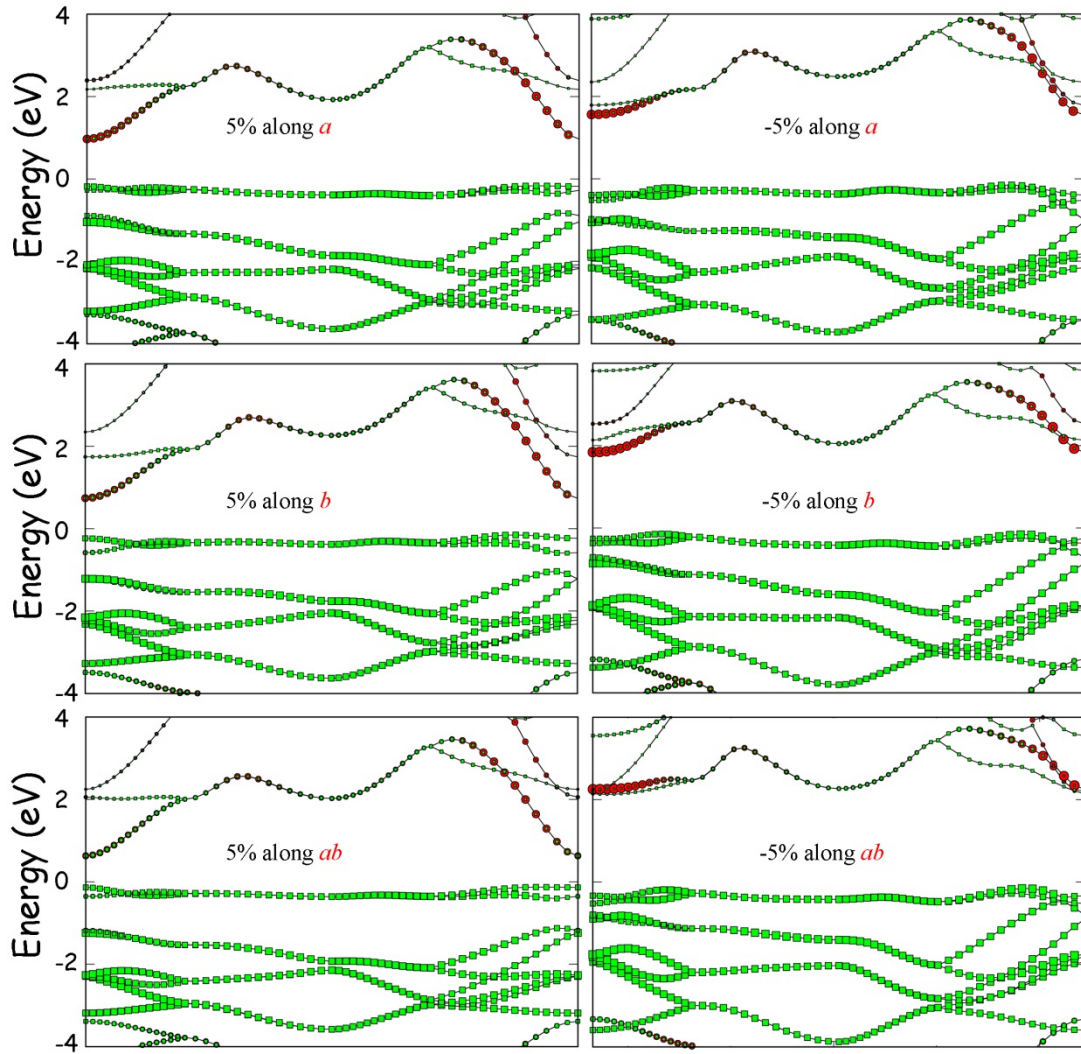

**Figure S4** HSE06 band structures of P-NH under uniaxial or biaxial strain of 5% or -5%.

**Table S1** Computed charge transfer for P-NH-half, P-NH, P-O-half and P-O based on Bader's charge analysis,  $P^1$  denotes the phosphorus atoms with NH or O while  $P^2$  denotes those without NH or O. The unit of the charge transfer is  $e^-$ , positive values indicate electron gain while negative values electron loss.

|           | $P^1$ | $P^2$ | $N$   | $H$   | $O$   |
|-----------|-------|-------|-------|-------|-------|
| P-NH-half | -1.15 | +0.03 | +1.64 | -0.52 | N/A   |
| P-NH      | -1.12 | N/A   | +1.64 | -0.52 | N/A   |
| P-O-half  | -1.29 | +0.03 | N/A   | N/A   | +1.26 |
| P-O       | -1.27 | N/A   | N/A   | N/A   | +1.27 |

**Table S2** Computed formation energies (in eV/P) of P-O and P-NH with an uniaxial strain (along *a* or *b* axis) or a biaxial strain of +5% or -5%.

|                                          | +5%    | 0%     | -5%    |
|------------------------------------------|--------|--------|--------|
| P-O uniaxial along <i>a</i>              | -1.588 | -1.612 | -1.604 |
| P-O uniaxial along <i>b</i>              | -1.583 | -1.612 | -1.608 |
| P-O biaxial along <i>a</i> and <i>b</i>  | -1.562 | -1.612 | -1.591 |
| P-NH uniaxial along <i>a</i>             | -0.180 | -0.212 | -0.194 |
| P-NH uniaxial along <i>b</i>             | -0.181 | -0.212 | -0.211 |
| P-NH biaxial along <i>a</i> and <i>b</i> | -0.145 | -0.212 | -0.195 |
